# Supplementary material for: Evolution of intra-tumoral heterogeneity across different pathological stages in papillary thyroid carcinoma
Source: Springer Nature journal article supplement (doi:10.1186/s12935-022-02680-1), 2022-08-22

**Figure S1. Altered pathways in different tumor stages in PTC**

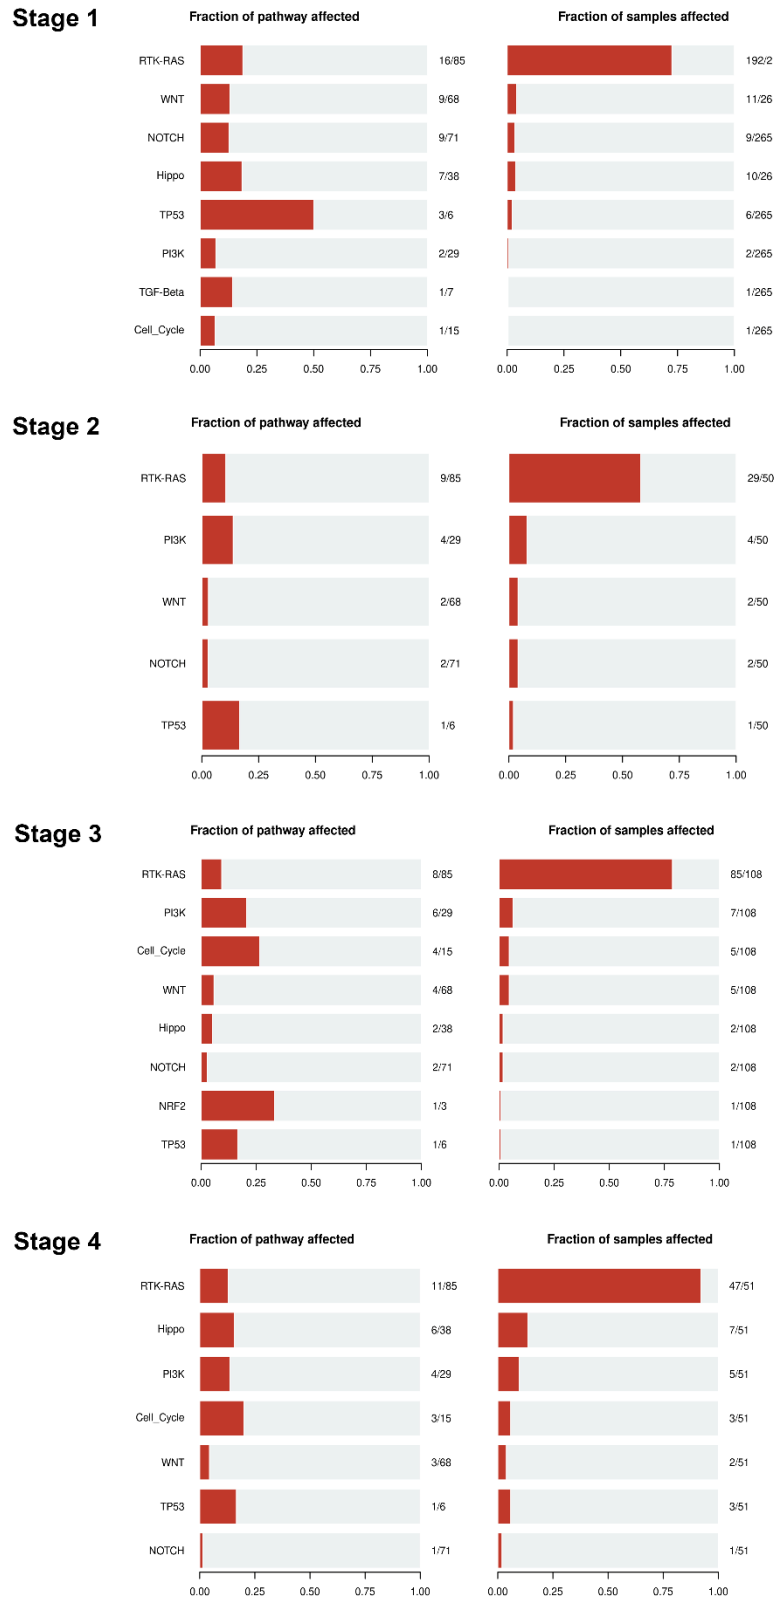

Supplement: MOESM6 [file 12935_2022_2680_MOESM6_ESM-1.pdf]
